RESEARCH ARTICLE

# Molecular Characterization and Transcriptional Regulation Analysis of the Bovine *PDHB* Gene

Anning Li<sup>1</sup>, Yaran Zhang<sup>1</sup>, Zhidong Zhao<sup>1</sup>, Mingming Wang<sup>1</sup>, Linsen Zan<sup>1,2\*</sup>

**1** College of Animal Science and Technology, Northwest A&F University, Yangling 712100, Shaanxi, P. R. China, **2** National Beef Cattle Improvement Center, Northwest A&F University, Yangling 712100, Shaanxi, P. R. China

\* [zanlinsen@163.com](mailto:zanlinsen@163.com)

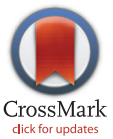

**OPEN ACCESS**

**Citation:** Li A, Zhang Y, Zhao Z, Wang M, Zan L (2016) Molecular Characterization and Transcriptional Regulation Analysis of the Bovine *PDHB* Gene. PLoS ONE 11(7): e0157445. doi:10.1371/journal.pone.0157445

**Editor:** Andre van Wijnen, University of Massachusetts Medical, UNITED STATES

**Received:** July 29, 2015

**Accepted:** May 31, 2016

**Published:** July 5, 2016

**Copyright:** © 2016 Li et al. This is an open access article distributed under the terms of the [Creative Commons Attribution License](https://creativecommons.org/licenses/by/4.0/), which permits unrestricted use, distribution, and reproduction in any medium, provided the original author and source are credited.

**Data Availability Statement:** All relevant data are within the paper.

**Funding:** This research was funded by the National Natural Science Foundation of China (Grant No. 31402042), National 863 Program of China (Grant No. 2013AA102505) and the Northwest A & F University Special Funds of Central Colleges Basic Scientific Research Operating Expenses (Grant No. 2014YB009). The funders had no role in study design, data collection and analysis, decision to publish, or preparation of the manuscript.

## Abstract

The *pyruvate dehydrogenase beta subunit (PDHB)* is a subunit of pyruvate dehydrogenase (E1), which catalyzes pyruvate into acetyl-CoA and provides a linkage between the tricarboxylic acid cycle (TCA) and the glycolysis pathway. Previous studies demonstrated *PDHB* to be positively related to the intramuscular fat (IMF) content. However, the transcriptional regulation of *PDHB* remains unclear. In our present study, the cDNA of bovine *PDHB* was cloned and the genomic structure was analyzed. The phylogenetic tree showed bovine *PDHB* to be closely related to goat and sheep, and least related to chicken. Spatial expression pattern analysis revealed the products of bovine *PDHB* to be widely expressed with the highest level in the fat of testis. To understand the transcriptional regulation of bovine *PDHB*, 1899 base pairs (bp) of the 5'-regulatory region was cloned. Sequence analysis neither found consensus TATA-box nor CCAAT-box in the 5'-flanking region of bovine *PDHB*. However, a CpG island was predicted from nucleotides -284 to +117. Serial deletion constructs of the 5'-flanking region, evaluated in dual-luciferase reporter assay, revealed the core promoter to be located 490bp upstream from the transcription initiation site (+1). Electrophoretic mobility shift assay (EMSA) and chromatin immunoprecipitation assay (ChIP) in combination with asite-directed mutation experiment indicated both myogenin (MYOG) and the CCAAT/enhancer-binding protein beta (C/EBPβ) to be important transcription factors for bovine *PDHB* in skeletal muscle cells and adipocytes. Our results provide an important basis for further investigation of the bovine *PDHB* function and regulation in cattle.

## Introduction

The pyruvate dehydrogenase complex (PDC) is a “gateway” enzyme for the mitochondrial oxidative metabolism of carbohydrates, catalyzing pyruvate into acetyl-CoA and carbon dioxide, and providing a linkage between glycolysis and the tricarboxylic acid cycle (TCA) pathway [1]. PDC is composed of three enzymatic components: pyruvate dehydrogenase (E1), dihydroli-poamide acetyltransferase (E2) and lipoamide dehydrogenase (E3). PDC plays a central role in the maintenance of glucose homeostasis in mammals [2]. The activity of PDC is regulated by

**Competing Interests:** The authors have declared that no competing interests exist.

phosphorylation and dephosphorylation [1] and SIRT4 [3]. Moreover, PDC deficiency is associated with various diseases, such as epilepsy [4,5], primary lactic acidosis [6], and cardiovascular diseases [7].

The enzyme E1 is a heterotetramer consisting of two alpha and two beta subunits which are encoded by the *pyruvate dehydrogenase alpha subunit (PDHA)* and the *pyruvate dehydrogenase beta subunit (PDHB)*, respectively. The product of *PDHB* expression is distributed in mitochondria [8]. Mutations in the *PDHB* gene lead to a series of metabolic diseases, such as primary lactic acidosis [9], leigh syndrome [10], and congenital deficiency of the PDC [11]. Moreover, in gastric cancer cells, over-expression of *PDHB* helps the pyruvate metabolism to move into the TCA process rather than into the glycolysis process, consequently inhibiting cell growth and cell migration [12]. In addition, *PDHB* was identified to interact with prolyl-hydroxylase PHD3 [13] and ATP6AP2 [14].

The intramuscular fat (IMF) content is one of the most important traits for meat quality affecting flavor, juiciness and tenderness of meat [15,16]. Recent studies show the positive relationship between the *PDHB* expression level and the IMF content. Furthermore, *PDHB* expression was reported to be significantly different between low-marbled and high-marbled steer groups in beef cattle [17]. In pigs, the expression level of *PDHB* is positively related to the IMF content in the longissimus dorsi muscle [18]. Similarly, *PDHB* expression is significantly different between lean and fat lines of the Pekin duck [19]. Furthermore, using a quantitative proteomics approach, our previous study revealed the protein expression level of *PDHB* to be significantly different between obese and lean pigs [20]. Therefore, we speculate the *PDHB* gene to play an important role in animal IMF deposition.

However, the published information on the bovine *PDHB* gene is very limited. In this study, the full length cDNA was cloned and the spatial expression pattern of bovine *PDHB* was analyzed. In addition, the transcriptional activity of the bovine *PDHB* gene 5'-regulatory region was identified in both skeletal muscle cells and adipocytes. Our results provide a solid basis for further research on the functions of the bovine *PDHB* gene.

## Materials and Methods

### Ethics Statement

All animal procedures were performed according to guidelines laid down by the China Council on Animal Care, and the protocols were approved by the Experimental Animal Management Committee (EAMC) of Northwest A&F University.

### Molecular cloning and sequence analysis

The complete *PDHB* coding sequence (CDS) with primers (*PDHB*-CDSF/R, Table 1) and longissimus dorsi muscle cDNA was cloned. To obtain the 5'-regulatory region, we searched the *PDHB* gene in the UCSC genome database (<http://genome.ucsc.edu/cgi-bin/hgGateway>). We isolated a bovine genomic sequence (bosTau4\_refGene\_NM\_001035435 range = chr22:43767058–43774471) and cloned 1899 bp of 5'-regulatory region sequence with the primers (*PDHB*-PF/R, Table 1). We used genomic DNA extracted from Qinchuan cattle blood as template and applied 2×GC Buffer I (TaKaRa, Biotechnology Co. Ltd, Dalian, P.R.C.) to amplify 5'-regulatory region sequence. The potential transcription factor binding sites were analyzed using the Genomatix suite (<http://www.genomatix.de/>), TESS (<http://www.cbil.upenn.edu/cgi-bin/tess/tess?RQ=WELCOME>) and TFSEARCH (<http://www.cbrc.jp/research/db/TFSEARCH.html>). CpG islands were predicted using Meth Primer (<http://www.urogene.org/methprimer/>).

We obtained the 4kb5'-regulatory region of *PDHB* in cattle (gi|258513345:43457246–43461246), sheep (gi|417531901:42930424–42934424), goat (gi|541128965:42734750–42738750),

Table 1. Primers utilized in this study.

| Primer name    | Primer sequence(5'-3')                      | Binding region | PCR(TM) (°C) | Size (bp) |
|----------------|---------------------------------------------|----------------|--------------|-----------|
| PDHB-CDSF      | AGATGGCGGTGGTTGCTGTG                        | 5'-UTR         | 63           | 1166      |
| PDHB-CDSR      | ATTAAAAGTCTTATGGGAT                         | 3'-UTR         | —            | —         |
| PDHB-PF        | CCCAATTTCTTGCATCTCACCAT                     | -1724/-1702    | 60.9         | 1899      |
| PDHB-PR        | CTGGCAGGGAGAGAGAGAAGACGC                    | +152/+175      | —            | —         |
| PDHB-GSP1      | CACTGGGTTGTTATCCCGAATGGC                    | +659/+682      | 68           | 682       |
| PDHB-GSP2      | CCCAGCCATAGCGGCACCTACAGC                    | +377/+400      | 60           | 400       |
| GAPDH-F        | CCAACGTGTCTGTTGTGGAT                        | —              | 60           | 80        |
| GAPDH-R        | CTGCTTCACCACCTTCTTGA                        | —              | —            | —         |
| PDHB-RT-F      | TCTGAGATGGGCTTTGCTGG                        | Exon 3–4       | 60           | 109       |
| PDHB-RT-R      | TGACCTGGTCGATGGCTTGC                        | Exon 5         | —            | —         |
| PDHB-R         | <b>CCCGGGT</b> TCCGCACCAACACAGC             | +103/+119      | —            | —         |
| PDHB-P1        | <b>GGTACC</b> CCCAATTTCTTGCATCT             | -1725/-1709    | 60           | 1844      |
| PDHB-P2        | <b>GGTACC</b> TTTCTCTCTCTAGCACT             | -1354/-1338    | 60           | 1473      |
| PDHB-P3        | <b>GGTACC</b> GGCCTCCCTGCCTCTGC             | -1054/-1038    | 60           | 1173      |
| PDHB-P4        | <b>GGTACC</b> TACTAGCGTGTCCGA               | -790/-774      | 60           | 909       |
| PDHB-P5        | <b>GGTACC</b> TTCACTCTATCCATCTG             | -490/-474      | 60           | 609       |
| PDHB-P6        | <b>GGTACC</b> CCAAAATACCAACACGG             | -190/-174      | 60           | 309       |
| MYOG-F         | TTAACATAA <b>TGCCTGG</b> CACACATGAAA        | -388/-382      | —            | 609       |
| MYOG-R         | TTTCATGTGTG <b>CCAGGCA</b> TTATGTTAA        | —              | —            | —         |
| m MYOG-F       | CTTAACATAATG <b>TGCGC</b> CACACATGAAAGC     | -388/-382      | 60           | 609       |
| m MYOG-R       | GCTTTCATGTGTG <b>GCAGC</b> ATTATGTTAAG      | —              | —            | —         |
| C/EBPβ-F       | AAAGACAGTG <b>TTCCAG</b> GGTAAGTCTGT        | -331/-325      | —            | 609       |
| C/EBPβ-R       | ACAAGTTACC <b>CTGGAAA</b> CACTGTCTTT        | —              | —            | —         |
| mC/EBPβ-F      | CCAAAAGACAGTGT <b>GGAC</b> AGGGTAAGTGTGTCAG | -331/-325      | 60           | 609       |
| mC/EBPβ-R      | CTGACAAGTTACCCTG <b>TCC</b> ACACTGTCTTTTGG  | —              | —            | —         |
| ChIP- MYOG-F   | GCACTTAACATAATGCCTGG                        | -488/-463      | 60           | 168       |
| ChIP- MYOG-R   | ACATAATCTGGTGACTGGGT                        | -340/-321      | —            | —         |
| ChIP-C/EBPβ -F | CCTATGAGAATAAAGTGAGC                        | -418/-399      | 60           | 120       |
| ChIP-C/EBPβ -R | AGTCTGACAAGTTACCCTGG                        | -318/-299      | —            | —         |
| ChIP-control-F | GATGTGCCTATGCCTTATGC                        | Exon 10        | 60           | 125       |
| ChIP-control-R | ATTCCAATGACCTGAACTTC                        | Exon 10        | —            | —         |

doi:10.1371/journal.pone.0157445.t001

porcine (gi|347618781:c44131745-44127745), dog (gi|357579611:32181538-32185538), human (gi|568815595:c58437807-58433807), mouse (gi|372099096:c8176930-8172930), rat (gi|666183559:18537242-18541242) and chicken (gi|358485500:c11816992-11812992) from the genome database at the National Center for Biotechnology Information (NCBI). We performed multi-alignments of the 5'-regulatory region among the nine species using ClustalX 2.0.

### Structural and phylogenetic tree analysis

We used the SMART database (<http://smart.embl-heidelberg.de/>) to predict putative domains. We constructed the phylogenetic tree as previously described [21].

### 5'-Rapid amplification of cDNA ends (5'-RACE)

To identify the transcription initiation sites, 5'-RACE from total RNA of subcutaneous fat was performed according to the manufacturer's protocol using the SMART<sup>TM</sup> RACE Kit (Clontech

Inc, Palo Alto, CA, USA). We applied the nest PCR primers (*PDHB*-GSP1 and *PDHB*-GSP2, [Table 1](#)) to obtain the 5'-end of the *PDHB* gene and used touchdown PCR in the first PCR with conditions as previously described [21]. The second PCR template was a 20-fold dilution of the first PCR products.

### Real-time PCR analysis of spatial expression pattern

We obtained sixteen tissue samples (longissimus dorsi muscle, kidney, heart, biceps femoris, liver, subcutaneous fat, spleen, lung, cecum, rumen, reticulum, omasum, abomasums, testis fat, large intestine and small intestine) from three adult Chinese indigenous Qinchuan cattle and selected *glyceraldehyde-3-phosphate dehydrogenase* (*GAPDH*) as the endogenous reference. We used the primers of *PDHB*-RT-F/R ([Table 1](#)) and *GAPDH*-F/R ([Table 1](#)) [22] for this assay. The cycling conditions were according to SYBR Premix Ex Taq<sup>TM</sup>II (TaKaRa, Biotechnology Co. Ltd, Dalian, P.R.C.), using the ABI 7500 RT-PCR system (Applied Biosystems, USA). We used the  $2^{-\Delta\Delta C_t}$  method for this assay.

### Cell culture, transfection and dual-luciferase reporter assay

We cultured the mouse myoblast cell line (C2C12) and the 3T3-L1 cell line in Dulbecco's modified Eagle's medium (DMEM) supplemented with 10% fetal bovine serum (FBS) (GIBCO-Invitrogen) under humidified air containing 5% CO<sub>2</sub> at 37°C. 5'-nested PCR primers (*PDHB*-P1~P6, [Table 1](#)) and common 3' primer (*PDHB*-R, [Table 1](#)) were used to amplify six serial deletion fragments of the 5'-flanking region. Then these fragments were cloned into the *KpnI*-*SmaI* site of the pGL3-basic vector (Promega Corp.). After sequencing verification, we extracted the plasmids with an Endo-free Plasmid Mini Kit (OMEGA, USA). We co-transfected the plasmids (0.8 μg) and the lipofectamine 2000 (2 μl) into C2C12 or 3T3-L1 cells grown in 24-well plates with 10 ng pRL-TK (Promega Corp.). At 5 h after transfection, we replaced the media with DMEM with 2% horse serum (HS) (GIBCO-Invitrogen) and incubated for 40 h to induce differentiation of the C2C12 myoblasts into myotubes. We performed all remaining steps as previously described [21].

### Site-directed mutagenesis

We mutated the transcription factor-binding sites for MYOG and C/EBPβ with the corresponding primers (mMYOG-F/R, mC/EBPβ-F/R, [Table 1](#)) using the Quick Change Site-Directed Mutagenesis Kit (Stratagene, La Jolla, CA, USA). PCR was carried out as previously described [21].

### Electrophoretic mobility shift assay (EMSA)

After differentiation of the C2C12 myoblasts into myotubes for 7 days, we prepared nuclear protein extracts as previously described [21,23]. We incubated probes of a 200 fmol of 5'-biotin labeled MYOG (or C/EBPβ) with 10 μg nuclear extracts of C2C12 myotubes (or 10 μg 3T3-L1 nuclear extracts), 2 μl 10× binding buffer, 1 μl 50% Glycerol, 1 μl MgCl<sub>2</sub> and 1 μl poly (dI.dC) in a volume of 20 μl. We incubated 5 μg of antibodies myogenin (sc-12732×, Santa Cruz Biotechnology, CA) (or C/EBPβ (sc-150×, Santa Cruz Biotechnology, CA)) with the nuclear extracts before adding the labeled probes. We used 6% polyacrylamide gels to separate DNA-protein complexes. Several steps followed according to the Light Shift<sup>®</sup> Chemiluminescent EMSA Kit (Pierce Corp., Rockford, IL, USA) Manufacturer's Instructions.

### Chromatin immunoprecipitation (ChIP) assay

We isolated longissimus dorsi muscle and inguinal fat from bulls at 3 days after birth (n = 3). We conducted the ChIP assay using the EZ-ChIP<sup>™</sup> Kit (Millipore, Bedford, MA, USA) according to

the manufacturer's protocol. We cross-linked the DNA-protein complexes with 37% formaldehyde and neutralized with glycine. After sonication, we added about 200–1000 bp of fragmented chromatin into the ChIP dilution buffer. We immunoprecipitated an equal amount of chromatin overnight at 4°C with 4 $\mu$ g of the myogenin (or C/EBP $\beta$ ) antibodies and normal mouse IgG. We then collected the immunoprecipitated products with Protein A+G coated magnetic beads. We eluted the bound chromatin in ChIP Elution Buffer and digested with proteinase K, then purified the DNA for PCR analysis. We used the primers (ChIP-MYOG-F/R and ChIP-C/EBP $\beta$ -F/R, [Table 1](#)) and the negative control primers (ChIP-control-F/R, [Table 1](#)) in the RT-PCR and ChIP-QPCR. % Input =  $2^{-(\Delta\text{Ct}(\text{Ct}[\text{ChIP}] - (\text{Ct}[\text{Input}] - \text{Log}_2(\text{Input Dilution Factor}))))}$  [24]. As a negative control, we used the immunoprecipitate products from the normal mouse IgG group.

## Statistical analysis

All values are expressed as mean $\pm$ standard deviation (SD). We analyzed the differences between groups with a Student's two-tailed T-test. \*  $P < 0.05$ . \*\*  $P < 0.01$ .  $n = 3$ .

## Results

### Molecular cloning and sequence analysis

Based on the bovine *PDHBc* DNA sequence (GenBank No. NM\_001035435.3), we obtained a 1576 bp cDNA. It contained an open reading frame (ORF) of 1080 bp, which had 359 amino acids (aa) encoded with a calculated molecular mass of 39.13 kDa and an isoelectric point (pI) of 6.466. Our cDNA consisted of a 5'-UTR of 91 bp and a 3'-UTR of 405 bp with a consensus AATAAA polyadenylation signal 16 bp upstream of the poly (A) stretch. The bovine *PDHB* gene spanned approximately 5.49 kb on the genome, containing 10 exons and 9 introns ([Fig 1A](#)). In addition, the bovine PDHB protein contains two putative domains: the transketolase, pyrimidine binding domain (Transketpyr) resides in 33–208 amino acid residues and the [transketolaseC](#) domain resides in 226–350 aa ([Fig 1A](#)).

The bovine PDHB amino acid sequence shared a high similarity with other mammalian, with the following levels of identity: sheep PDHB1 (99%), goat PDHB1 (99%), porcine (97%), dog PDHB1 (96%), sheep PDHB2 (94%), goat PDHB2 (94%), mouse (94%), rat (94%), human PDHB1 (94%), human PDHB2 (89%), dog PDHB2 (86%) and chicken (82%). The phylogenetic tree indicated the bovine PDHB to be closest related to goat and sheep, and the lowest relatedness to chicken of all nine species evaluated for this study ([Fig 2](#)).

### Transcription initiation site of the bovine PDHB gene

In the first and second PCR, we cloned 682 bp and 400 bp fragments, respectively ([Fig 1B](#)). Sequencing eleven positive clones identified seven different 5' ends with 91 bp, 31 bp, 26 bp, 16 bp, 14 bp, 12 bp and 11 bp upstream from the translational start site, respectively ([Fig 1C](#)). We designated the cytosine residue (C) as +1 and found it to be located 91 bp upstream from the translational start site.

### Characterization of the bovine PDHB gene 5'-regulatory region

We cloned a 1899 bp fragment of the bovine *PDHB* gene 5'-regulatory region spanning nucleotides from nucleotides -1724 to +175 and submitted it to GenBank (GenBank No. KJ649747). Several transcription factor-binding sites were recognized via sequence analysis of the 5'-regulatory region, including the Sp1 transcription factor (Sp1), the transcription factor Yin Yang-1 (YY1), the CCAAT/enhancer-binding protein  $\alpha$  (C/EBP $\alpha$ ), myogenin (MYOG), the CCAAT/enhancer-binding protein  $\beta$  (C/EBP $\beta$ ) and the cAMP responsive element-binding protein

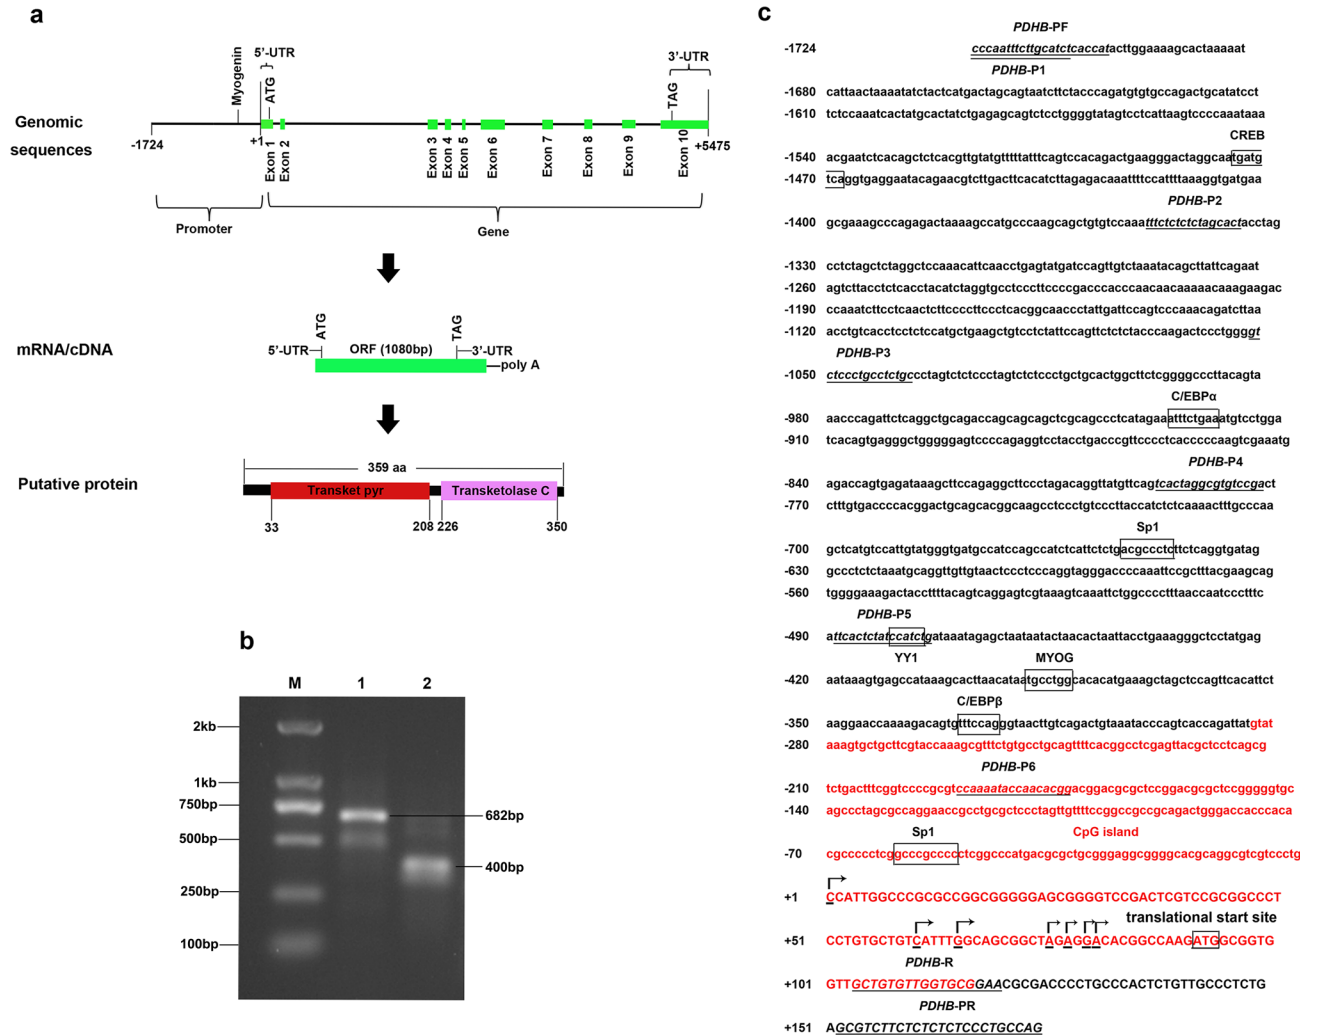

**Fig 1. Structure characteristics of the bovine PDHB gene.** a. Here we show the genomic, mRNA and protein components in detail. 5'-UTR:5'- untranslated region, 3'- UTR:3'- untranslated region, ORF: open reading frame, Transketpyr: transketolase, pyrimidine binding domain. b. 5'-RACE. Lane 1 and 2 are products of the first and second PCR, respectively. Lane M represents the marker of DL2000. c. 5'-regulatory region sequence of bovine PDHB gene. Arrows mark the transcription initiation sites. The cytosine residue is designated as +1. The transcription factor binding sites are boxed. The primers are underlined with the respective names below the line. The CpG island is indicated with red color.

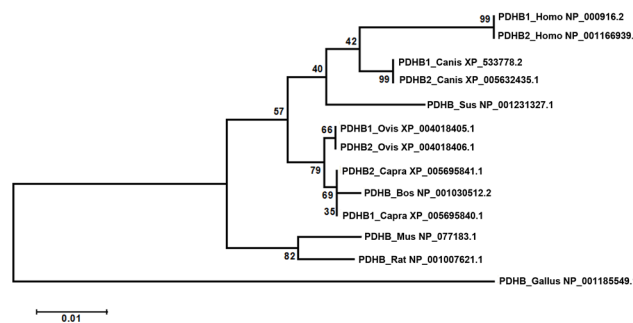

**Fig 2. Phylogenetic tree analysis of PDHB.** We calculated 8000 bootstrap replicates to bootstrap confidence values.

doi:10.1371/journal.pone.0157445.g002

doi:10.1371/journal.pone.0157445.g001

(CREB) (Fig 1C). Interestingly, we did not find a consensus TATA-box or CCAAT-box in the 5'-flanking region. However, using Meth Primer, a CpG island with a length of 401 bp between nucleotides -284 and +117 was predicted (Fig 1C).

Compared to the bovine *PDHB* gene 5'-regulatory region (GenBank No. KJ649747), the 5'-flanking sequences of cattle, goat and sheep shared 97%, 94% and 93% sequence similarity. However, it had no significant sequence similarity with the 5'-flanking sequences of porcine, dog, human, rat, mouse or chicken *PDHB*.

### Spatial expression pattern of the bovine *PDHB* gene

In order to understand the role of the bovine *PDHB* gene products in various tissues, it was necessary to provide mRNA expression profiles via real-time PCR analysis. The results showed the highest expression in testis fat, followed by lung, cecum, reticulum, rumen, kidney, spleen, liver, large intestine, heart, small intestine, omasum, subcutaneous fat, abomasums, longissimus dorsi and biceps femoris (Fig 3). This result indicates the *PDHB* mRNA to be widely expressed with the highest level in testis fat, revealing the *PDHB* gene to be a housekeeping gene in multiple tissue types.

### Transcriptional regulation of the bovine *PDHB* gene

To identify the transcriptional activity of the bovine *PDHB* gene 5'-regulatory region, we generated six serial deletion constructs in pGL3-basic containing -1725/+119, -1354/+119, -1054/+119, -790/+119, -490/+119 and -190/+119. After we transfected the construct plasmids into C2C12 cells, the transcriptional activity of the construct -490/+119 was about 25-fold higher than the construct -190/+119 (Fig 4A). The activities of all other constructs were higher than the construct -190/+119 and lower than that of the construct -490/+119. Inducing the C2C12 cells via HS after transfection, significantly increased the transcriptional activities of the six constructs and the activity of the construct -490/+119 was highest in the six constructs. After transferring the construct plasmids into 3T3-L1 cells, the transcriptional activity of the construct -490/+119 was also highest in the six constructs and the activity of the construct -190/+119 was increased compared to that of the C2C12 cells (Fig 4B). These results suggest a core functional promoter to be present in the upstream region of 490 bp from the transcription initiation site.

To identify important positive regulatory elements among the nine species, the region from nucleotides -490 to +92 was predicted by transcription factor binding sites prediction software. The result of multi-alignments revealed MYOG, C/EBP $\beta$  SP1 and AP1 to be conserved in this region for domestic animals such as cattle, sheep, goat, porcine and dog (Fig 5). Mutation of the MYOG site at position -388 to -382 led to a sharp decrease in activity of 70%, while mutation of the C/EBP $\beta$  site at position -331 to -325 had no effect on the promoter activity of C2C12 myotubes (Fig 6A). In contrast, mutation of the C/EBP $\beta$  site at position -331 to -325

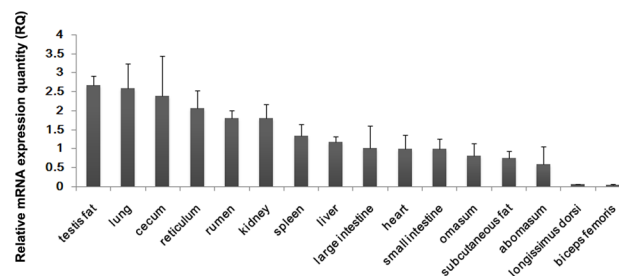

**Fig 3. Spatial expression analysis of bovine *PDHB* mRNA.** We normalized the mRNA expression levels of *PDHB* to those of *GAPDH*. Error bars represent the standard deviation (SD) (n = 3).

doi:10.1371/journal.pone.0157445.g003

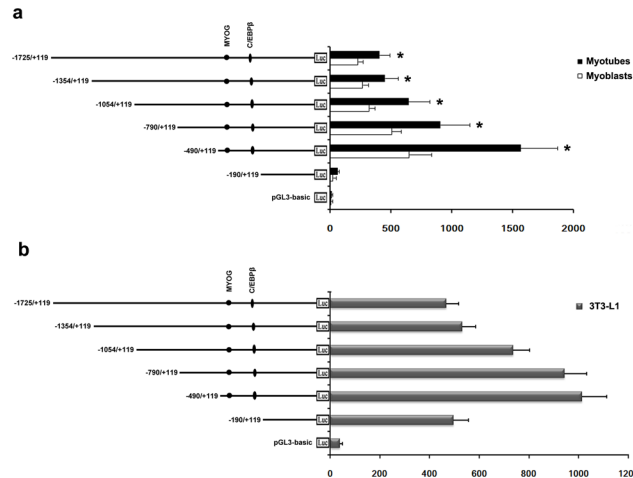

**Fig 4. Promoter activity analysis of the bovine *PDHB* gene.** a. We transferred six serial deletion constructs in pGL3-basic into C2C12 cells. After 5 h we replaced the transfection mixture with DMEM with 5% FBS (myoblasts) or 2% HS (myotubes). b. We transferred the same constructs into 3T3-L1 cells. We normalized relative luciferase activities to Renilla luciferase activity. The transcription factor binding sites of MYOG and C/EBP $\beta$  are indicated with closed circles and ellipses, respectively. \*,  $P < 0.05$ . Error bars represent the SD ( $n = 3$ ).

doi:10.1371/journal.pone.0157445.g004

led to a decrease in activity of 36%, while mutation of the MYOG site at position -388 to -382 had no significant effect on promoter activity in 3T3-L1 cells (Fig 6B).

In order to validate interaction between the transcription factors MYOG and C/EBP $\beta$  with the 5'-regulatory region of *PDHB*, we carried out EMSA and ChIP assays both in vitro and vivo. The EMSA results revealed that 5'-biotin labeled MYOG probes with nuclear extracts of C2C12 myotubes formed two upshifted bands (Fig 7A, lane 2). When 5'-biotin labeled MYOG probes were added with unlabeled MYOG oligonucleotides, the upshifted bands disappeared (Fig 7A, lane 3). The shifted MYOG complexes did not compete with unlabeled mutated MYOG oligonucleotides (Fig 7A, lane 4). Adding the MYOG antibody strongly diminished the

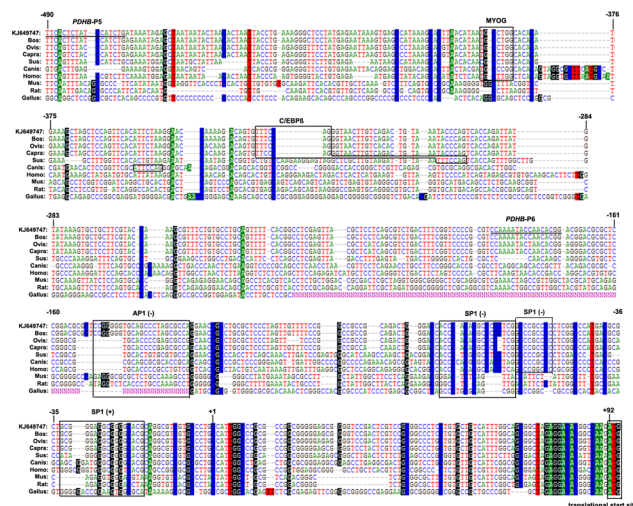

**Fig 5. Multi-alignments sequence analysis of the core functional promoter of bovine *PDHB* in relation to other mammals.** The transcription factor binding sites are marked with boxes. The nucleotide sequence is numbered in 5'-regulatory sequence of the bovine *PDHB* gene (GenBank No. KJ649747).

doi:10.1371/journal.pone.0157445.g005



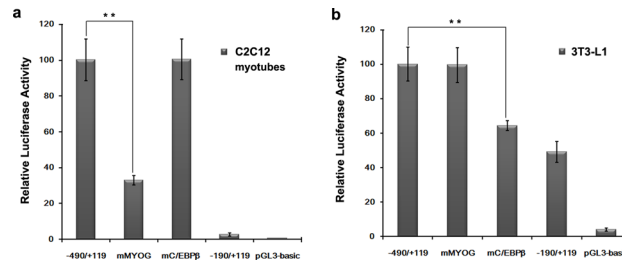

**Fig 6. Functional analysis of the mutated MYOG and C/EBPβ sites.** We transferred the mutated sites MYOG and C/EBPβ into C2C12 myotubes (a) and 3T3-L1 cells (b). \*\*, P<0.01. Error bars represent the SD (n = 3).

doi:10.1371/journal.pone.0157445.g006

upshifted bands (Fig 7A, lane 5). C/EBPβ site and 3T3-L1 cells nuclear extracts exhibited similar results with MYOG site and C2C12 myotubes nuclear extracts (Fig 7B). The ChIP results revealed MYOG interacted with the MYOG binding site (Fig 8A and 8C) and C/EBPβ interacted with the C/EBPβ binding site in the *PDHB* promoter (Fig 8B and 8D).

## Discussion

The bovine *PDHB* aa sequence had 99% identity to goat and sheep, and was most closely related to goat and sheep. In addition, the bovine *PDHB* gene 5'-regulatory region shared 94% and 93% sequence similarity with goat and sheep, respectively. These results show that *PDHB* gene is highly conservative in ruminants. The bovine *PDHB* contained the two putative domains transketpyr and *transketolaseC*, which indicates its function to be mainly displayed in the energy metabolic process. The result of spatial expression patterns revealed the expression level of *PDHB* to be higher in fat compared to muscle, which is consistent with the expression level of *PDHB* being positively related with the IMF content [17–20]. This result implies that the *PDHB* gene could be used as a molecular marker for the IMF content.

To date, this is the first research report on transcriptional regulation analysis in the bovine *PDHB* gene. In the present study, we identified seven transcription initiation sites for the first

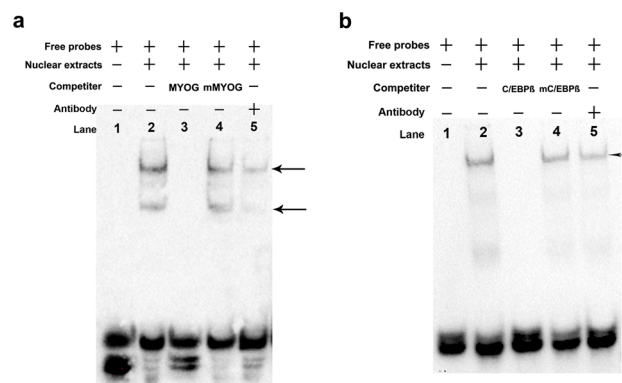

**Fig 7. EMSA involving 5'-biotin labeled MYOG and C/EBPβ probes.** a. 5'-biotin labeled MYOG probes and nuclear extracts of C2C12 myotubes. Lane 1: MYOG probes; lane 2: MYOG probes with nuclear extracts of C2C12 myotubes; lane 3: MYOG probes and nuclear extracts with a 125-fold unlabeled MYOG oligonucleotides; lane 4: MYOG probes and nuclear extracts with a 125-fold unlabeled mMYOG oligonucleotides. lane 5: MYOG probes and nuclear extracts with myogenin antibodies. b. 5'-biotin labeled C/EBPβ probes and nuclear extracts of 3T3-L1 cells. Lane 1: C/EBPβ probes; lane 2: C/EBPβ probes with nuclear extracts of 3T3-L1 cells; lane 3: C/EBPβ probes and nuclear extracts with 125-fold unlabeled C/EBPβ oligonucleotides; lane 4: C/EBPβ probes and nuclear extracts with 125-fold unlabeled mC/EBPβ oligonucleotides. lane 5: C/EBPβ probes and nuclear extracts with C/EBPβ antibodies.

doi:10.1371/journal.pone.0157445.g007

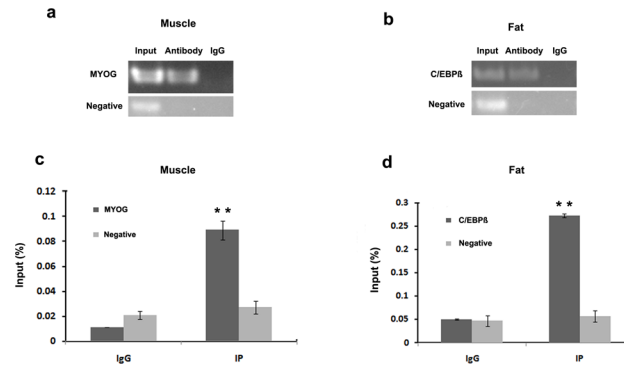

**Fig 8. ChIP assay of MYOG and C/EBPβ binding to PDHB promoter in vivo.** We analyzed immunoprecipitated products for MYOG (a) and C/EBPβ (b) antibodies via RT-PCR. We analyzed immunoprecipitated products for MYOG (c) and C/EBPβ (d) antibodies via ChIP-QPCR. We used total chromatin from muscle (a and c) and fat (b and d) as the input. We used normal mouse IgG as the negative control antibodies. \*\*,  $P < 0.01$ . Error bars represent the SD ( $n = 3$ ).

doi:10.1371/journal.pone.0157445.g008

time. Multiple transcription initiation sites are a typical feature in TATA-less promoters [21,25]. There was no alternatively spliced transcript found in the bovine *PDHB*, while two transcripts were presented in sheep, goat and human *PDHB* [26], respectively.

To understand the transcriptional regulation of the bovine *PDHB* gene, we cloned 5'-regulatory region spanning nucleotides from -1724 to +175. Sequence analysis revealed that no consensus TATA-box or CCAAT-box was present in the 5'-flanking region, which was similar to that of human *PDHB* [27]. However, GC-rich regions in the bovine *PDHB* gene promoter indicate that the transcription activity might be dependent on the methylation level of the CpG island [28]. The deletion analysis of the 5'-regulatory region showed the highest transcription activity of the construct -490/+119, while we found the transcription activity of the construct -1354/+119 to be significantly decreased in C2C12 and 3T3-L1 cells. This demonstrates the region from nucleotides -490 to +119 to be a core functional promoter and there were repressor binding sites present between -490 and -1354.

After analysis with online prediction software, we found the potential transcription factor binding sites MYOG and C/EBPβ on the sequence from nucleotides -490 to -190 to be conserved in domestic animals. Myogenin (MYOG) is a member of the family of muscle regulatory factors (MRFs) that also include myogenic differentiation 1 (MYOD), myogenic factor 5 (MYF5) and myogenic regulatory factor 4 (MRF4, or MYF6) [29–31]. MYOG is a muscle-specific, basic-helix-loop-helix (bHLH) transcription factor, which is up-regulated during the differentiation of myoblasts into multinucleated myotubes [29] and essential for the development of functional skeletal muscle [31]. A recent study reported MYOG to be a positive regulator in the transcriptional regulation of *muiple EGF-like domain 10 (MEGF10)* in C2C12 cells [32]. Mutation of the MYOG site in the present study in C2C12 myotubes, significantly decreased the transcription activity of *PDHB* promoter. Mixing 5'-biotin labeled MYOG probes with nuclear extracts of C2C12 myotubes, led to the upshift of two bands. We suspect the reason to be heterodimers-formation between MYOG and other bHLH proteins [33,34]. The ChIP assay confirms that transcription factor MYOG is capable of binding to the MYOG binding site in the *PDHB* promoter. The EMSA and ChIP results combined with mutation analysis suggest MYOG likely to be an important transcription factor regulating the expression of the bovine *PDHB* gene in skeletal muscle cells.

C/EBPβ is a member of the family of CCAAT/enhancer binding proteins (C/EBPs), and binds to promoter regions of target genes to regulate the expression of downstream genes [35].

A recent publication revealed *C/EBP $\beta$*  to be expressed early to activate *PPAR $\gamma$* , which is expressed in terminal adipocyte differentiation [36]. In this study, mutation of the *C/EBP $\beta$*  site in 3T3-L1 cells, significantly decreased the transcription activity of the *PDHB* promoter. Mixing 5'-biotin labeled *C/EBP $\beta$*  probes with nuclear extracts of 3T3-L1 cells, led to an upshift of the band. The ChIP assay confirms the transcription factor *C/EBP $\beta$*  to also be capable of binding to the *C/EBP $\beta$*  binding site in the *PDHB* promoter. These results reveal the *C/EBP $\beta$*  to be a key transcription factor for the bovine *PDHB* expression in adipocytes.

In summary, we cloned the CDS and promoter sequences of the bovine *PDHB* gene, and identified its transcription initiation sites. The amino acids and promoter sequences of bovine *PDHB* gene shared high similarity with the homologs of goat and sheep. We found the gene widely expressed with the highest level in testis fat. *MYOG* and *C/EBP $\beta$*  are likely important transcription factors for the expression of the bovine *PDHB* gene in skeletal muscle cells and adipocytes, respectively. Our results provide an important basis enabling further understanding of the transcriptional regulation and biological function of the bovine *PDHB* gene.

## Acknowledgments

This research was funded by the National Natural Science Foundation of China (Grant No.31402042), National 863 Program of China (Grant No. 2013AA102505) and the Northwest A&F University Special Funds of Central Colleges Basic Scientific Research Operating Expenses (Grant No. 2014YB009).

## Author Contributions

Conceived and designed the experiments: AL. Performed the experiments: AL YZ ZZ MW. Analyzed the data: AL. Contributed reagents/materials/analysis tools: AL LZ. Wrote the paper: AL.

## References

1. Patel MS, Nemeria NS, Furey W, Jordan F The pyruvate dehydrogenase complexes: structure-based function and regulation. *J Biol Chem.* 2014; 289: 16615–16623. doi: [10.1074/jbc.R114.563148](https://doi.org/10.1074/jbc.R114.563148) PMID: [24798336](https://pubmed.ncbi.nlm.nih.gov/24798336/)
2. Patel MS, Korotchkina LG Regulation of the pyruvate dehydrogenase complex. *Biochem Soc Trans.* 2006; 34: 217–222. PMID: [16545080](https://pubmed.ncbi.nlm.nih.gov/16545080/)
3. Mathias RA, Greco TM, Oberstein A, Budayeva HG, Chakrabarti R, Rowland EA, et al. Sirtuin 4 is a lipoamidase regulating pyruvate dehydrogenase complex activity. *Cell.* 2014; 159: 1615–1625. doi: [10.1016/j.cell.2014.11.046](https://doi.org/10.1016/j.cell.2014.11.046) PMID: [25525879](https://pubmed.ncbi.nlm.nih.gov/25525879/)
4. Prasad C, Rupa T, Prasad AN Pyruvate dehydrogenase deficiency and epilepsy. *Brain Dev.* 2011; 33: 856–865. doi: [10.1016/j.braindev.2011.08.003](https://doi.org/10.1016/j.braindev.2011.08.003) PMID: [21908116](https://pubmed.ncbi.nlm.nih.gov/21908116/)
5. Mercimek-Mahmutoglu S, Patel J, Cordeiro D, Hewson S, Callen D, Donner EJ, et al. Diagnostic yield of genetic testing in epileptic encephalopathy in childhood. *Epilepsia.* 2015.
6. Imbard A, Boutron A, Vequaud C, Zater M, de Lonlay P, de Baulny HO, et al. Molecular characterization of 82 patients with pyruvate dehydrogenase complex deficiency. Structural implications of novel amino acid substitutions in E1 protein. *Mol Genet Metab.* 2011; 104: 507–516. doi: [10.1016/j.ymgme.2011.08.008](https://doi.org/10.1016/j.ymgme.2011.08.008) PMID: [21914562](https://pubmed.ncbi.nlm.nih.gov/21914562/)
7. Sun W, Liu Q, Leng J, Zheng Y, Li J The role of Pyruvate Dehydrogenase Complex in cardiovascular diseases. *Life Sci.* 2015; 121: 97–103. doi: [10.1016/j.lfs.2014.11.030](https://doi.org/10.1016/j.lfs.2014.11.030) PMID: [25498896](https://pubmed.ncbi.nlm.nih.gov/25498896/)
8. Taylor SI, Mukherjee C, Jungas RL Regulation of pyruvate dehydrogenase in isolated rat liver mitochondria. Effects of octanoate, oxidation-reduction state, and adenosine triphosphate to adenosine diphosphate ratio. *J Biol Chem.* 1975; 250: 2028–2035. PMID: [1116996](https://pubmed.ncbi.nlm.nih.gov/1116996/)
9. Okajima K, Korotchkina LG, Prasad C, Rupa T, Phillips JA Iii, Ficioglu C, et al. Mutations of the E1 $\beta$  subunit gene (*PDHB*) in four families with pyruvate dehydrogenase deficiency. *Molecular genetics and metabolism.* 2008; 93: 371–380. doi: [10.1016/j.ymgme.2007.10.135](https://doi.org/10.1016/j.ymgme.2007.10.135) PMID: [18164639](https://pubmed.ncbi.nlm.nih.gov/18164639/)

10. Quintana E, Mayr JA, Garcia Silva MT, Font A, Tortoledo MA, Moliner S, et al. PDH E(1)beta deficiency with novel mutations in two patients with Leigh syndrome. *J Inherit Metab Dis*. 2009.
11. Han Z, Zhong L, Srivastava A, Stacpoole PW Pyruvate dehydrogenase complex deficiency caused by ubiquitination and proteasome-mediated degradation of the E1 subunit. *J Biol Chem*. 2008; 283: 237–243. PMID: [17923481](#)
12. Cai Z, Zhao JS, Li JJ, Peng DN, Wang XY, Chen TL, et al. A combined proteomics and metabolomics profiling of gastric cardia cancer reveals characteristic dysregulations in glucose metabolism. *Mol Cell Proteomics*. 2010; 9: 2617–2628. doi: [10.1074/mcp.M110.000661](#) PMID: [20699381](#)
13. Kikuchi D, Minamishima YA, Nakayama K Prolyl-hydroxylase PHD3 interacts with pyruvate dehydrogenase (PDH)-E1beta and regulates the cellular PDH activity. *Biochem Biophys Res Commun*. 2014; 451: 288–294. doi: [10.1016/j.bbrc.2014.07.114](#) PMID: [25088999](#)
14. Kanda A, Noda K, Ishida S ATP6AP2/(pro)renin receptor contributes to glucose metabolism via stabilizing the pyruvate dehydrogenase E1 beta subunit. *J Biol Chem*. 2015.
15. Gerbens F, Verburg FJ, Van Moerkerk HT, Engel B, Buist W, Veerkamp JH, et al. Associations of heart and adipocyte fatty acid-binding protein gene expression with intramuscular fat content in pigs. *J Anim Sci*. 2001; 79: 347–354. PMID: [11219443](#)
16. Platter WJ, Tatum JD, Belk KE, Koontz SR, Chapman PL, Smith GC Effects of marbling and shear force on consumers' willingness to pay for beef strip loin steaks. *J Anim Sci*. 2005; 83: 890–899. PMID: [15753345](#)
17. Sasaki Y, Nagai K, Nagata Y, Doronbekov K, Nishimura S, Yoshioka S, et al. Exploration of genes showing intramuscular fat deposition-associated expression changes in musculus longissimus muscle. *Anim Genet*. 2006; 37: 40–46. PMID: [16441294](#)
18. Seroo NV, Veroneze R, Ribeiro AM, Verardo LL, Braccini Neto J, Gasparino E, et al. Candidate gene expression and intramuscular fat content in pigs. *J Anim Breed Genet*. 2011; 128: 28–34. doi: [10.1111/j.1439-0388.2010.00887.x](#) PMID: [21214641](#)
19. Zheng A, Chang W, Hou S, Zhang S, Cai H, Chen G, et al. Unraveling molecular mechanistic differences in liver metabolism between lean and fat lines of Pekin duck (*Anas platyrhynchos domestica*): a proteomic study. *J Proteomics*. 2014; 98: 271–288. doi: [10.1016/j.jprot.2013.12.021](#) PMID: [24412807](#)
20. Li A, Mo D, Zhao X, Jiang W, Cong P, He Z, et al. Comparison of the longissimus muscle proteome between obese and lean pigs at 180 days. *Mamm Genome*. 2013; 24: 72–79. doi: [10.1007/s00335-012-9440-0](#) PMID: [23160730](#)
21. Li A, Chen Y, Zhao X, Niu Y, Cong P, Zhang Z, et al. Characterization and transcriptional regulation analysis of the porcine TNFAIP8L2 gene. *Mol Genet Genomics*. 2010; 284: 185–195. doi: [10.1007/s00438-010-0558-z](#) PMID: [20640581](#)
22. Wang H, Cheng G, Fu C, Wang H, Yang W, Wang H, et al. Sequence analysis of bovine C/EBPdelta gene and its adipogenic effects on fibroblasts. *Mol Biol Rep*. 2014; 41: 251–257. doi: [10.1007/s11033-013-2858-y](#) PMID: [24213926](#)
23. Li A, Zhao Z, Zhang Y, Fu C, Wang M, Zan L Tissue expression analysis, cloning, and characterization of the 5'-regulatory region of the bovine fatty acid binding protein 4 gene. *J Anim Sci*. 2015; 93: 5144–5152. doi: [10.2527/jas.2015-9378](#) PMID: [26641034](#)
24. Chakrabarti SK, James JC, Mirmira RG Quantitative assessment of gene targeting in vitro and in vivo by the pancreatic transcription factor, Pdx1. Importance of chromatin structure in directing promoter binding. *J Biol Chem*. 2002; 277: 13286–13293. PMID: [11825903](#)
25. Chow G, Knudson W Characterization of promoter elements of the human HYAL-2 gene. *J Biol Chem*. 2005; 280: 26904–26912. PMID: [15923194](#)
26. Hendrickson SL, Lautenberger JA, Chinn LW, Malasky M, Sezgin E, Kingsley LA, et al. Genetic variants in nuclear-encoded mitochondrial genes influence AIDS progression. *PLoS One*. 2010; 5: e12862. doi: [10.1371/journal.pone.0012862](#) PMID: [20877624](#)
27. Koike K, Urata Y, Koike M Molecular cloning and characterization of human pyruvate dehydrogenase beta subunit gene. *Proc Natl Acad Sci U S A*. 1990; 87: 5594–5597. PMID: [2377599](#)
28. Bird AP, Wolffe AP Methylation-induced repression—belts, braces, and chromatin. *Cell*. 1999; 99: 451–454. PMID: [10589672](#)
29. Lee EJ, Malik A, Pokharel S, Ahmad S, Mir BA, Cho KH, et al. Identification of genes differentially expressed in myogenin knock-down bovine muscle satellite cells during differentiation through RNA sequencing analysis. *PLoS One*. 2014; 9: e92447. doi: [10.1371/journal.pone.0092447](#) PMID: [24647404](#)
30. Zhao X, Mo D, Li A, Gong W, Xiao S, Zhang Y, et al. Comparative analyses by sequencing of transcripts during skeletal muscle development between pig breeds differing in muscle growth rate and fatness. *PLoS One*. 2011; 6: e19774. doi: [10.1371/journal.pone.0019774](#) PMID: [21637832](#)

31. Charge SB, Rudnicki MA Cellular and molecular regulation of muscle regeneration. *Physiol Rev.* 2004; 84: 209–238. PMID: [14715915](#)
32. Park SY, Yun Y, Kim MJ, Kim IS Myogenin is a positive regulator of MEGF10 expression in skeletal muscle. *Biochem Biophys Res Commun.* 2014; 450: 1631–1637. doi: [10.1016/j.bbrc.2014.07.061](#) PMID: [25044114](#)
33. Lassar AB, Davis RL, Wright WE, Kadesch T, Murre C, Voronova A, et al. Functional activity of myogenic HLH proteins requires hetero-oligomerization with E12/E47-like proteins in vivo. *Cell.* 1991; 66: 305–315. PMID: [1649701](#)
34. Brennan TJ, Olson EN Myogenin resides in the nucleus and acquires high affinity for a conserved enhancer element on heterodimerization. *Genes Dev.* 1990; 4: 582–595. PMID: [2163343](#)
35. Ramji DP, Foka P CCAAT/enhancer-binding proteins: structure, function and regulation. *Biochem J.* 2002; 365: 561–575. PMID: [12006103](#)
36. Guo L, Li X, Tang QQ Transcriptional regulation of adipocyte differentiation: a central role for CCAAT/enhancer-binding protein (C/EBP) beta. *J Biol Chem.* 2015; 290: 755–761. doi: [10.1074/jbc.R114.619957](#) PMID: [25451943](#)
